# Supplementary material
Source: MDPI journal article supplement (https://www.mdpi.com/2073-4352/12/10/1380)
Supplement: s1 [file s1]

# The Family of $M^{II}_3(\text{Te}^{\text{IV}}\text{O}_3)_2(\text{OH})_2$ ( $M = \text{Mg}, \text{Mn}, \text{Co}, \text{Ni}$ ) Compounds—Prone to Inclusion of Foreign Components into Large Hexagonal Channels

Felix Eder <sup>1</sup>, Matthias Weil <sup>1,\*</sup>, Owen P. Missen <sup>2,3</sup>, Uwe Kolitsch <sup>4,5</sup> and Eugen Libowitzky <sup>5</sup>

<sup>1</sup> Institut für Chemische Technologien und Analytik, Abteilung Strukturchemie, TU Wien, Getreidemarkt 9/164-E164-05, A-1060 Vienna, Austria

<sup>2</sup> School of Earth, Atmosphere and Environment, Monash University, 9 Rainforest Walk, Clayton, VIC 3800, Australia

<sup>3</sup> Geosciences, Museums Victoria, GPO Box 666, Melbourne 3001, Australia

<sup>4</sup> Naturhistorisches Museum Wien, Burgring 7, A-1010 Vienna, Austria

<sup>5</sup> Institut für Mineralogie und Kristallographie, Universität Wien, Josef-Holaubek-Platz 2, A-1090 Vienna, Austria

\* Correspondence: matthias.weil@tuwien.ac.at

## Supplementary material

### Tables

**Table S1.** Data collection and refinement details of related  $M^{II}_3(\text{TeO}_3)_2(\text{OH})_2$ -type compounds

| Empirical formula                           | $\text{Co}_3\text{H}_2\text{O}_8\text{Te}_2$                    | $\text{Co}_3\text{H}_{1.76}\text{O}_{8.24}\text{S}_{0.12}\text{Te}_2$                    | $\text{Cl}_{0.18}\text{H}_{1.82}\text{Mn}_3\text{O}_{7.82}\text{Te}_2$               | $\text{H}_{1.70}\text{Mn}_3\text{O}_{8.30}\text{S}_{0.15}\text{Te}_2$                    |
|---------------------------------------------|-----------------------------------------------------------------|------------------------------------------------------------------------------------------|--------------------------------------------------------------------------------------|------------------------------------------------------------------------------------------|
| Cryst. Chem. Formula                        | $\text{Co}_3(\text{TeO}_3)_2(\text{OH})_{1.5}(\text{OH})_{0.5}$ | $\text{Co}_3(\text{TeO}_3)_2(\text{OH})_{1.5}\{(\text{SO}_4)_{0.12}(\text{OH})_{0.26}\}$ | $\text{Mn}_3(\text{TeO}_3)_2(\text{OH})_{1.5}\{\text{Cl}_{0.18}(\text{OH})_{0.32}\}$ | $\text{Mn}_3(\text{TeO}_3)_2(\text{OH})_{1.5}\{(\text{SO}_4)_{0.15}(\text{OH})_{0.20}\}$ |
| Obtained from batch                         | 2                                                               | 1                                                                                        | 8                                                                                    | 7                                                                                        |
| $M_r$                                       | 562.01                                                          | 569.45                                                                                   | 553.43                                                                               | 559.34                                                                                   |
| Temp. / °C                                  | 23                                                              | 23                                                                                       | 23                                                                                   | 23                                                                                       |
| Cryst. dim./ mm <sup>3</sup>                | 0.10×0.01×0.01                                                  | 0.10×0.015×0.015                                                                         | 0.22×0.03×0.03                                                                       | 0.11×0.02×0.02                                                                           |
| Cryst. colour                               | pink                                                            | purple                                                                                   | light-yellow                                                                         | light-yellow                                                                             |
| Cryst. form                                 | needle                                                          | needle                                                                                   | bar                                                                                  | bar                                                                                      |
| Space group, No.                            | $P6_3mc$ , 186                                                  | $P6_3mc$ , 186                                                                           | $P6_3mc$ , 186                                                                       | $P6_3mc$ , 186                                                                           |
| Formula units Z                             | 4                                                               | 4                                                                                        | 4                                                                                    | 4                                                                                        |
| $a$ / Å                                     | 13.0907(4)                                                      | 13.1102(7)                                                                               | 13.4364(6)                                                                           | 13.4509(4)                                                                               |
| $c$ / Å                                     | 5.02810(10)                                                     | 5.0179(4)                                                                                | 5.1738(3)                                                                            | 5.1410(2)                                                                                |
| $V$ / Å <sup>3</sup>                        | 746.21(5)                                                       | 746.91(10)                                                                               | 808.92(9)                                                                            | 805.53(6)                                                                                |
| $\mu$ / mm <sup>-1</sup>                    | 14.265                                                          | 14.290                                                                                   | 11.749                                                                               | 11.784                                                                                   |
| X-ray density / g·cm <sup>-3</sup>          | 5.003                                                           | 5.064                                                                                    | 4.544                                                                                | 4.612                                                                                    |
| $\vartheta_{\min}$ - $\vartheta_{\max}$ / ° | 4.434 - 29.978                                                  | 3.108 - 29.987                                                                           | 3.032 - 36.297                                                                       | 3.029 - 34.991                                                                           |
| $h$                                         | -18 - 10                                                        | -18 - 12                                                                                 | -22 - 17                                                                             | -20 - 21                                                                                 |
| $k$                                         | -14 - 18                                                        | -18 - 18                                                                                 | -17 - 22                                                                             | -21 - 13                                                                                 |
| $l$                                         | -7 - 7                                                          | -7 - 7                                                                                   | -8 - 8                                                                               | -8 - 8                                                                                   |
| Measured refl.                              | 11516                                                           | 12497                                                                                    | 10713                                                                                | 19118                                                                                    |
| Independent refl.                           | 811                                                             | 813                                                                                      | 1442                                                                                 | 1300                                                                                     |
| Observed refl. ( $I > 2\sigma(I)$ )         | 788                                                             | 721                                                                                      | 1412                                                                                 | 1245                                                                                     |
| $R_i$                                       | 0.0479                                                          | 0.0837                                                                                   | 0.0248                                                                               | 0.0443                                                                                   |
| $T_{\min}$ ; $T_{\max}$                     | 0.2398; 0.8669                                                  | 0.3185; 0.4554                                                                           | 0.5169; 0.7231                                                                       | 0.2816; 0.3604                                                                           |
| No. of parameters                           | 50                                                              | 41                                                                                       | 54                                                                                   | 63                                                                                       |
| Flack parameter [22, 23]                    | 0.04(5) using 342 quotients                                     | 0.02(12)                                                                                 | 0.00(5) using 635 quotients                                                          | 0.01(2) using 547 quotients                                                              |
| $R1$ ( $F^2 > 2\sigma(F^2)$ )               | 0.0235                                                          | 0.0318                                                                                   | 0.0172                                                                               | 0.0134                                                                                   |

|                        |         |         |         |         |
|------------------------|---------|---------|---------|---------|
| $wR2(F^2 \text{ all})$ | 0.0630  | 0.0749  | 0.0442  | 0.0273  |
| GOF                    | 1.096   | 1.028   | 1.092   | 1.025   |
| CSD-deposition<br>code | 2203362 | 2203361 | 2203364 | 2203366 |

---

Single-crystal measurements of samples from batches 1, 2 and 7 were performed on a STOE Stadivari diffractometer equipped with an Anton Paar Primux 50 MoK $_{\alpha}$  microsource and a DECTRIS EIGER<sup>®</sup> 2 R 1M CdTe detector. The instrument software was X-Area [X-Area, version 2.0, STOE & Cie GmbH, Darmstadt, Germany, 2021], for absorption LANA was used.

**Table S2.** Selected interatomic distances / Å in the crystal structures of of related  $M^{II}_3(\text{TeO}_3)_2(\text{OH})_2$ -type compounds

|               | $\text{Co}_3(\text{TeO}_3)_2(\text{OH})_{1.5} \cdot (\text{OH})_{0.5}$ | $\text{Co}_3(\text{TeO}_3)_2(\text{OH})_{1.5} \cdot \{(\text{SO}_4)_{0.12}(\text{OH})_{0.26}\}$ | $\text{Mn}_3(\text{TeO}_3)_2(\text{OH})_{1.5} \cdot \{\text{Cl}_{0.18}(\text{OH})_{0.32}\}$ | $\text{Mn}_3(\text{TeO}_3)_2(\text{OH})_{1.5} \cdot \{(\text{SO}_4)_{0.15}(\text{OH})_{0.20}\}$ |
|---------------|------------------------------------------------------------------------|-------------------------------------------------------------------------------------------------|---------------------------------------------------------------------------------------------|-------------------------------------------------------------------------------------------------|
| <i>M</i> 1—O2 | 2.039(5)                                                               | 2.032(8)                                                                                        | 2.137(3)                                                                                    | 2.121(2)                                                                                        |
| <i>M</i> 1—O1 | 2.104(4)                                                               | 2.110(6)                                                                                        | 2.149(2)                                                                                    | 2.1365(18)                                                                                      |
| <i>M</i> 1—O3 | 2.074(5)                                                               | 2.078(8)                                                                                        | 2.179(3)                                                                                    | 2.171(2)                                                                                        |
| <i>M</i> 1—O2 | 2.071(5)                                                               | 2.074(7)                                                                                        | 2.228(3)                                                                                    | 2.218(2)                                                                                        |
| <i>M</i> 1—O4 | 2.168(6)                                                               | 2.162(8)                                                                                        | 2.237(3)                                                                                    | 2.220(2)                                                                                        |
| <i>M</i> 1—O4 | 2.205(5)                                                               | 2.219(8)                                                                                        | 2.335(3)                                                                                    | 2.336(2)                                                                                        |
| Te1—O2 (2x)   | 1.889(5)                                                               | 1.891(7)                                                                                        | 1.875(2)                                                                                    | 1.874(2)                                                                                        |
| Te1—O1        | 1.909(8)                                                               | 1.903(11)                                                                                       | 1.890(4)                                                                                    | 1.888(3)                                                                                        |
| Te2—O3 (3x)   | 1.859(7)                                                               | 1.859(10)                                                                                       | 1.847(4)                                                                                    | 1.854(3)                                                                                        |

## Figures

### Batch 1

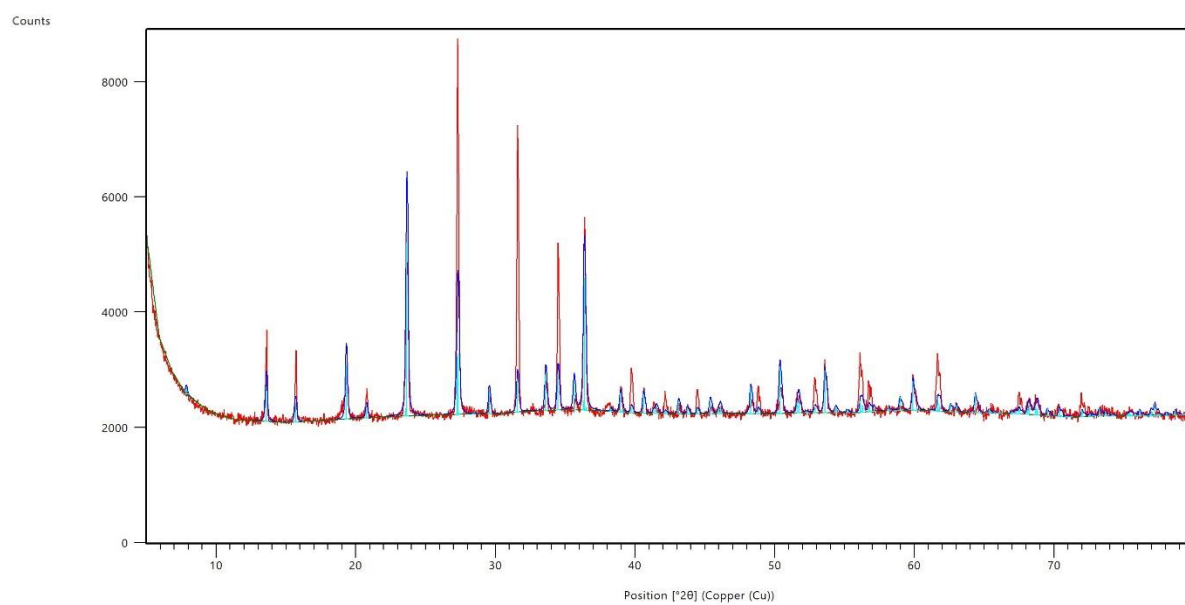

### Batch 1 heated at 210 °C

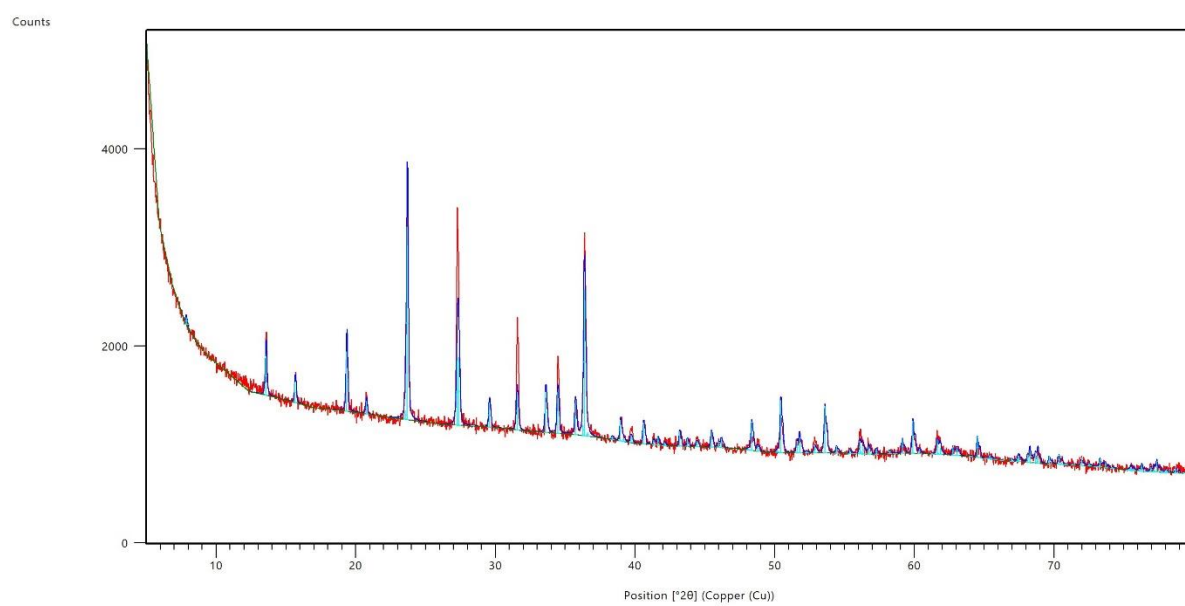

## Batch 2

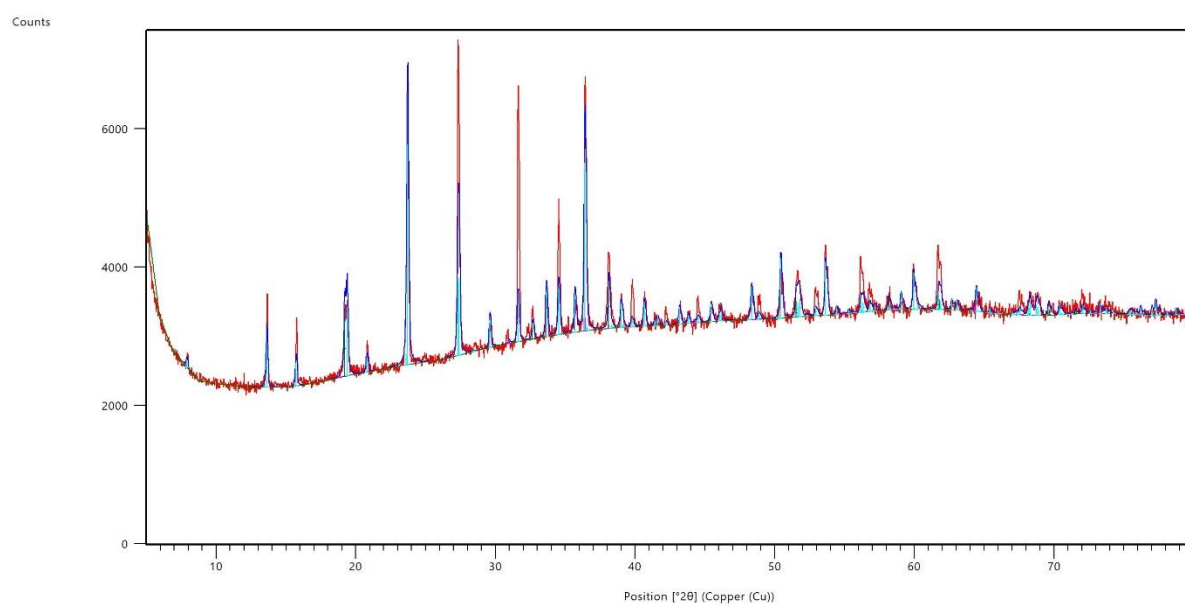

## Batch 2 heated at 210 °C

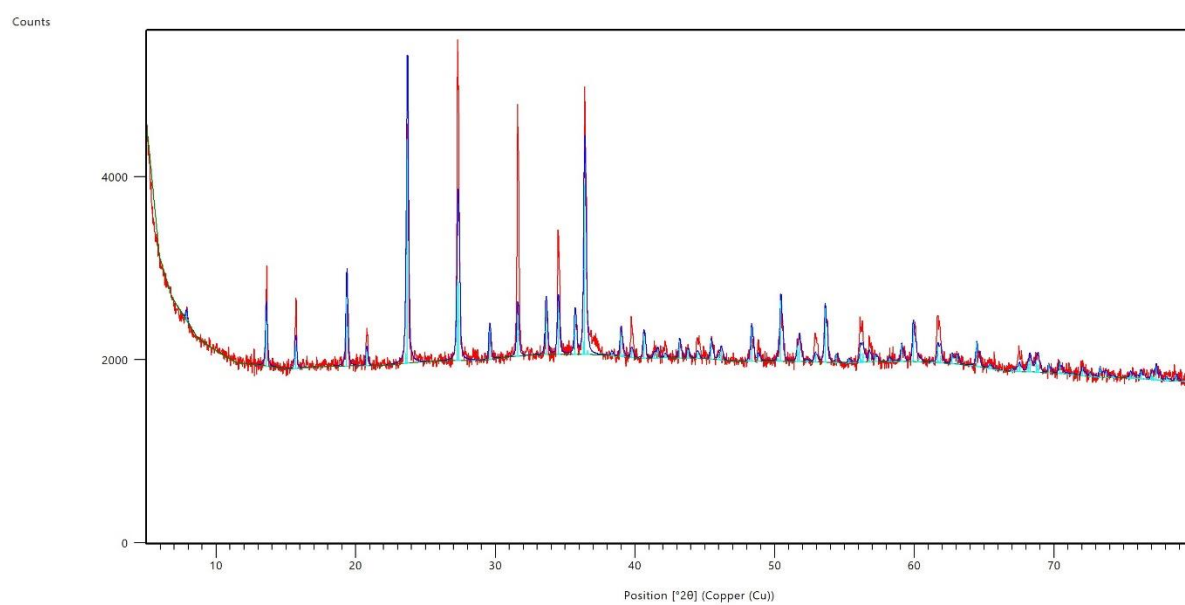

### Batch 3

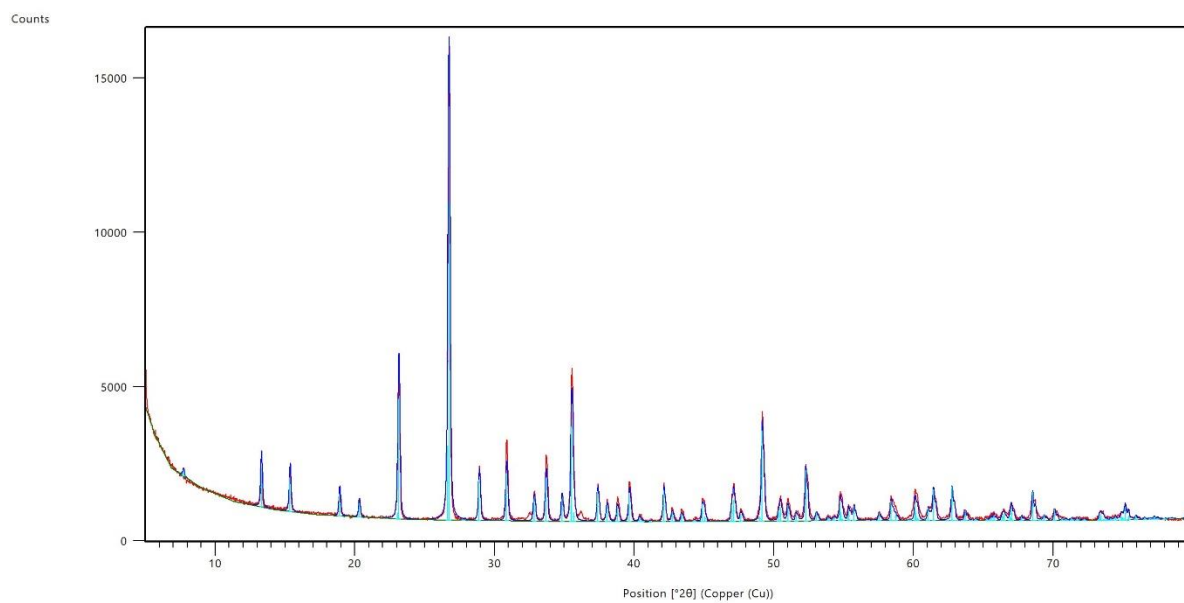

### Batch 4

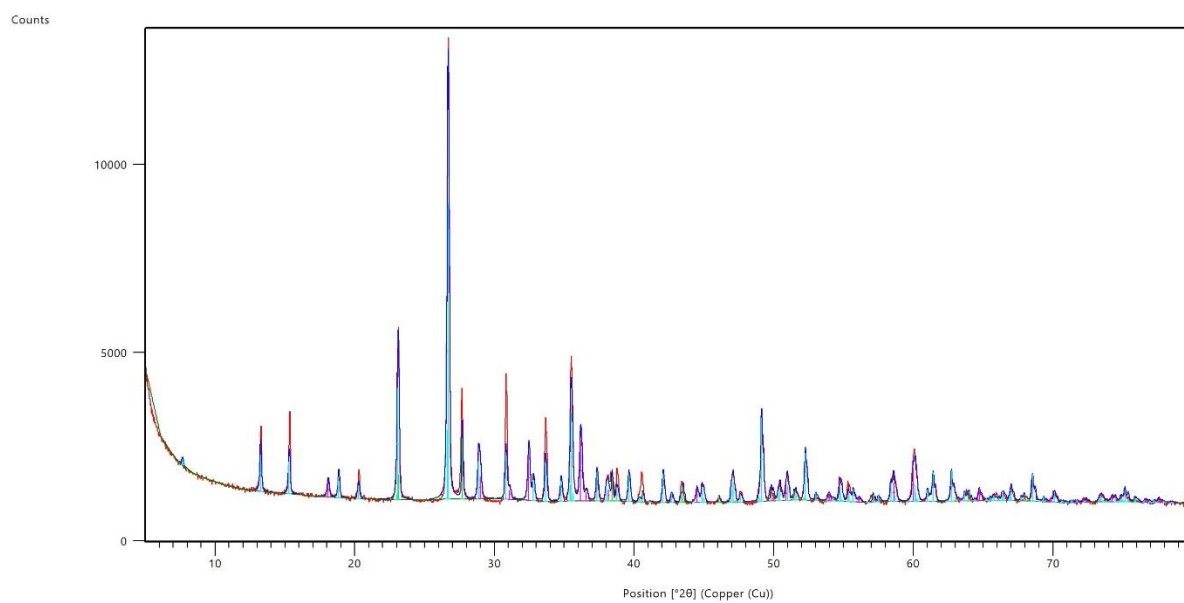

## Batch 5

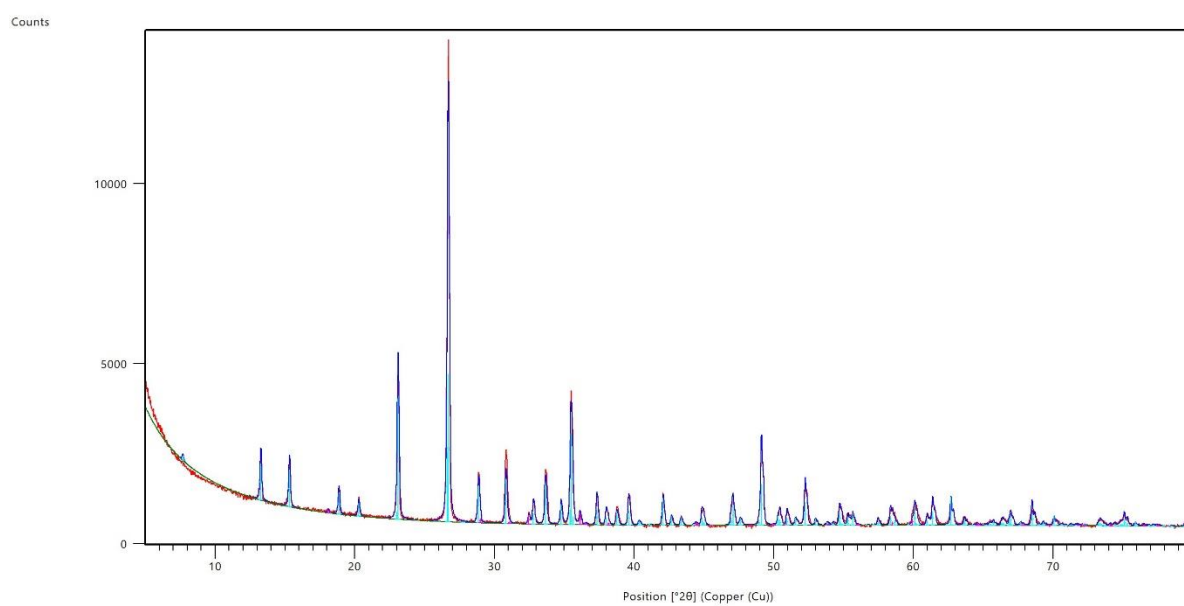

## Batch 6

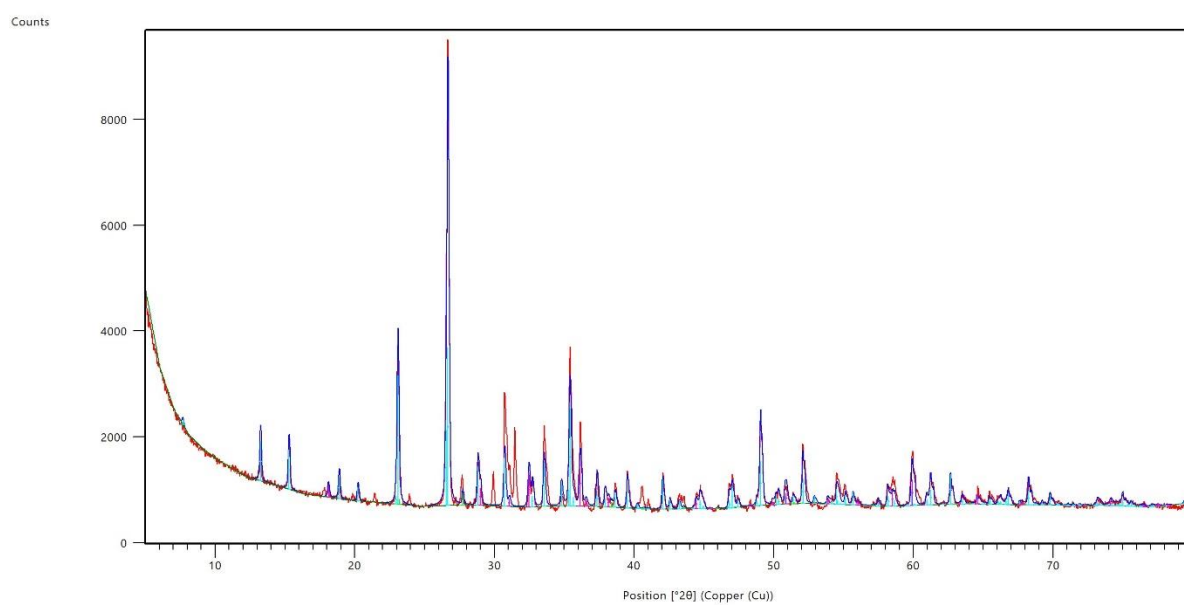

## Batch 7

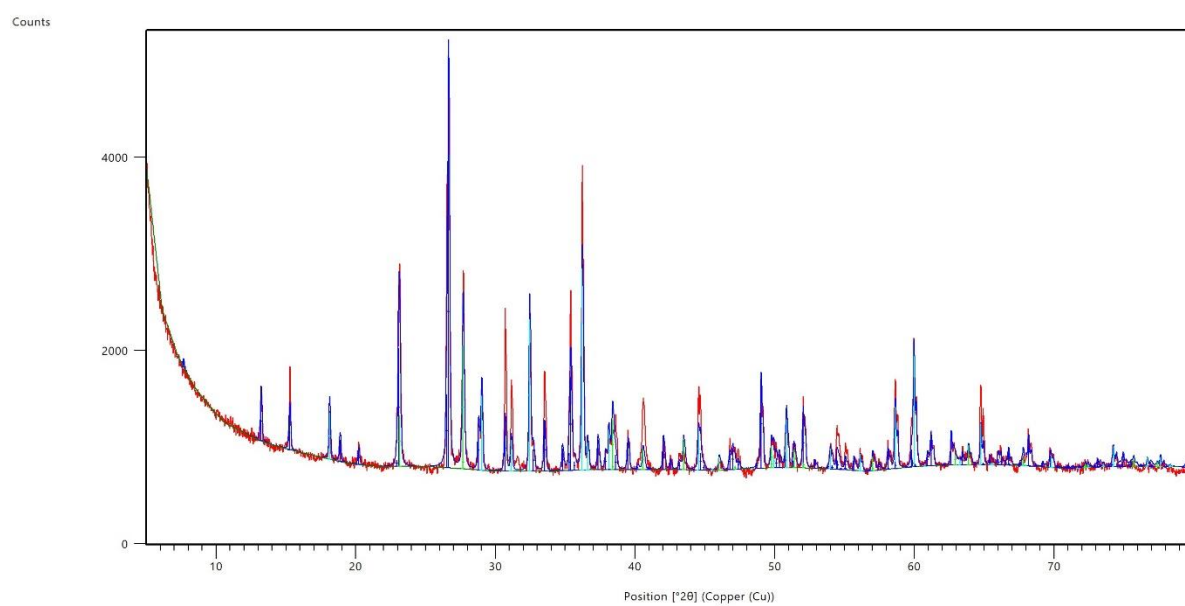

## Batch 8

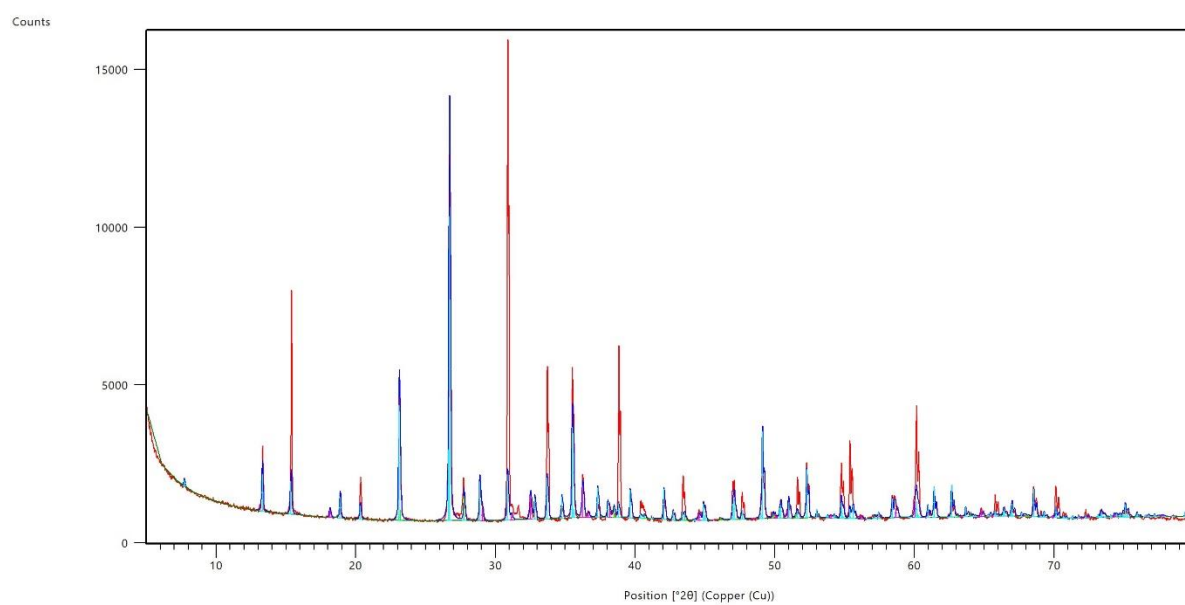



## Batch 9

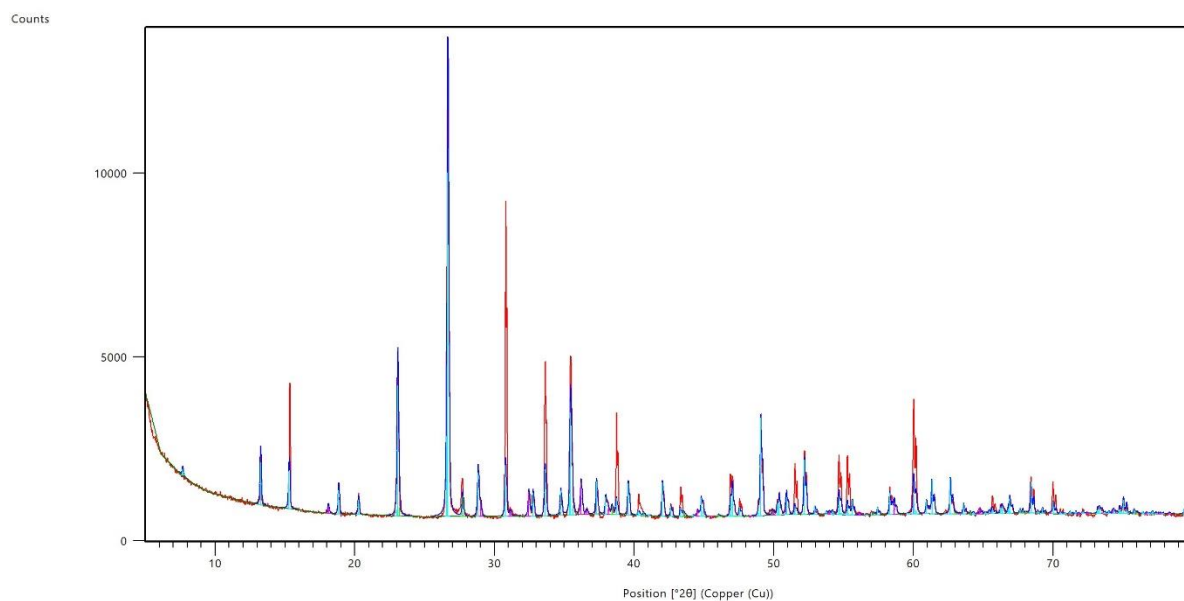

**Figure S1.** PXRD measurements of the different batches. Red lines indicate measured intensities. Contributions of  $M^{II}_3(\text{TeO}_3)_2(\text{OH})_2$ -type phases is indicated in turquoise, additional phases for batch 2 are  $\text{Co}_3\text{O}_4$ ,  $\text{Co}(\text{OH})_2$  (dark green), and for batches 4-9 are  $\text{Mn}_3\text{O}_4$  (pink), Te (light green).

(a)

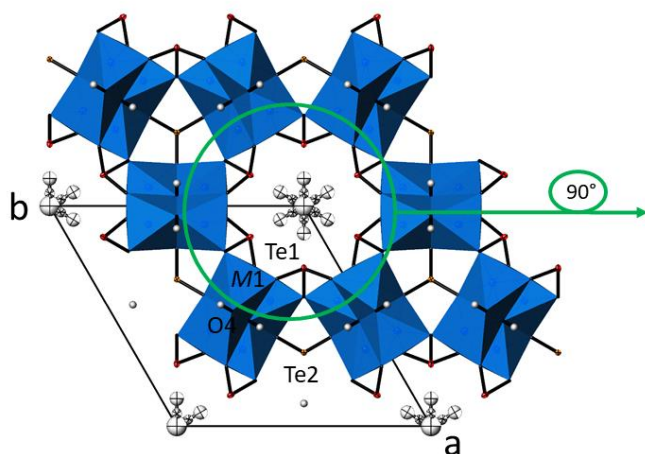

(b)

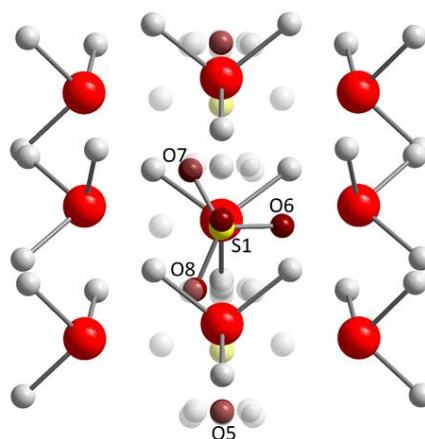

**Figure S2.** (a) Crystal structure of  $\text{Mn}_3(\text{TeO}_3)_2(\text{OH})_{1.5}\{(\text{SO}_4)_{0.15}(\text{OH})_{0.20}\}$  with further disorder modelling of the sulfate group in the hexagonal channels. Displacement ellipsoids are drawn at the 90% probability level (isotropic for O5 and the sulfate group; anisotropic for all other atoms). (b) The content of the hexagonal channel with surrounding  $[\text{Te1O}_3]$  units, and the O5 atom and the sulfate group in the centre.
